# 1 Sexual dimorphism in recombination landscape in red deer 2 (*Cervus elaphus*): a role for meiotic drive?

3 Susan E. Johnston, Jisca Huisman, Philip A. Ellis and Josephine M. Pemberton

4 Institute of Evolutionary Biology, University of Edinburgh, Edinburgh, EH9 3FL, United Kingdom.

5 Corresponding author: Susan.Johnston@ed.ac.uk

## 6 Abstract

7 High density linkage maps are an important tool to gain insight into the genetic architecture of  
8 traits of evolutionary and economic interest, and provide a resource to characterise variation  
9 in recombination landscapes. Here, we used information from the cattle genome and the 50K  
10 Cervine Illumina BeadChip to inform and refine a high density linkage map in a wild population  
11 of red deer (*Cervus elaphus*). We constructed a predicted linkage map of 38,038 SNPs and a  
12 skeleton map of 10,835 SNPs across 34 linkage groups. We identified several chromosomal  
13 rearrangements in the deer lineage, including six chromosome fissions, one fusion and two  
14 large inversions. Otherwise, our findings showed strong concordance with map orders in the  
15 cattle genome. The sex-averaged linkage map length was 2739.7cM and the genome-wide  
16 autosomal recombination rate was 1.04cM per Mb. The female autosomal map length was 1.21  
17 longer than that of males (2767.4cM vs 2280.8cM, respectively). Sex differences in map length  
18 were driven by markedly high female recombination rates in peri-centromeric regions, a pattern  
19 that is unusual relative to other mammal species. This effect was more pronounced in fission  
20 chromosomes that would have had to produce new centromeres. We propose two hypotheses  
21 to explain this effect: (1) that this mechanism may have evolved to counteract centromeric drive  
22 associated with meiotic asymmetry in oocyte production; and/or (2) that sequence characteris-  
23 tics suppressing recombination in close proximity to the centromere may not have yet evolved  
24 at neo-centromeres. Our study provides insight into how recombination landscapes vary and  
25 evolve in mammals, and will provide a valuable resource for studies of evolution, genetic im-  
26 provement and population management in red deer and related species.

## 27 Article Summary

28 We present a high density linkage map (>38,000 markers) in a wild population of Red deer  
29 (*Cervus elaphus*). Our investigation of the recombination landscape showed a marked differ-  
30 ence in recombination rates between the sexes in proximity to the centromere, with females  
31 showing an unusually elevated rate relative to other mammal species. This effect is most pro-  
32 nounced in chromosomes that would have produced a new centromere in the deer lineage. We  
33 propose that the observed effects have evolved to counteract selfish genetic elements associ-  
34 ated with asymmetrical female meiosis.

## 35 Introduction

36 The advent of affordable next-generation sequencing and SNP-typing assays allows large num-  
37 bers of polymorphic genetic markers to be characterised in almost any system. A common chal-  
38 lenge is how to organise these genetic variants into a coherent order for downstream analyses,  
39 as many approaches rely on marker order information to gain insight into genetic architectures  
40 and evolutionary processes (Ellegren, 2014). Linkage maps are often an early step in this pro-  
41 cess, using information on recombination fractions between markers to group and order them  
42 on their respective chromosomes (Sturtevant, 1913; Lander & Schork, 1994). Ordered mark-  
43 ers have numerous applications, including: trait mapping through quantitative trait locus (QTL)  
44 mapping, genome-wide association studies (GWAS) and regional heritability analysis (Bérénos  
45 *et al.*, 2015; Fountain *et al.*, 2016); genome-scans for signatures of selection and population  
46 divergence (Bradbury *et al.*, 2013; McKinney *et al.*, 2016); quantification of genomic inbreeding  
47 through runs of homozygosity (Kardos *et al.*, 2016); and comparative genomics and genome  
48 evolution (Brieuc *et al.*, 2014; Leitwein *et al.*, 2016). Linkage maps also provide an important  
49 resource in *de novo* genome assembly, as they provide information for anchoring sequence  
50 scaffolds and allow prediction of gene locations relative to better annotated species (Fierst,  
51 2015).

52 One application of high density linkage maps is the investigation of variation in contemporary  
53 recombination landscapes. Meiotic recombination is essential for proper disjunction in many  
54 species (Hassold & Hunt, 2001; Fledel-Alon *et al.*, 2009); it also generates new allelic combi-

55 nations upon which selection can act, and prevents the accumulation of deleterious mutations  
56 (Muller, 1964; Felsenstein, 1974; Charlesworth & Barton, 1996). Linkage maps have shown  
57 that recombination rates can vary within and between chromosomes, populations and species  
58 in a wide variety of taxa (Stapley *et al.*, 2008; Kawakami *et al.*, 2014; Smukowski & Noor,  
59 2011). One striking observation is that sex is consistently one of the strongest correlates with  
60 recombination rate and landscape variation. The direction and degree of sex differences in re-  
61 combination, known as “heterochiasmy”, can differ over relatively short evolutionary timescales,  
62 and whilst broad trends have been observed (e.g. increased recombination in females), many  
63 exceptions remain (Lenormand & Dutheil, 2005; Brandvain & Coop, 2012). Theoretical expla-  
64 nations for the evolution of heterochiasmy include haploid selection, sex-specific selection and  
65 sperm competition (Lenormand & Dutheil, 2005; Trivers, 1988; Burt, 2000), but empirical sup-  
66 port for each of these theories had been limited (Mank, 2009). One emerging hypothesis is the  
67 role of meiotic drive, where asymmetry in cell division during oogenesis can be exploited by self-  
68 ish genetic elements associated with centromere “strength” (Brandvain & Coop, 2012). Strong  
69 centromeres have increased levels of kinetochore proteins, and will preferentially be drawn to  
70 one pole of the oocyte, which will become an egg or a polar body, resulting in biased transmis-  
71 sion at the stronger/weaker centromere, respectively (Pardo-Manuel De Villena & Sapienza,  
72 2001; Chmátal *et al.*, 2014). Theoretical work has shown that higher female recombination at  
73 centromeric regions may counteract drive by increasing the uncertainty associated segregation  
74 into the egg (Haig & Grafen, 1991). As linkage map data for non-model species continues to  
75 proliferate, it is now increasingly possible to investigate the key hypotheses for recombination  
76 rate variation and heterochiasmy in a wider variety of taxa.

77 Nevertheless, creating linkage maps of many thousands of genome-wide markers *de novo* is  
78 a computationally intensive process requiring pedigree information, sufficient marker densities  
79 over all chromosomes and billions of locus comparisons. Furthermore, the ability to create a  
80 high resolution map is limited by the number of meioses in the dataset; as marker densities  
81 increase, more individuals are required to resolve genetic distances between closely linked  
82 loci (Kawakami *et al.*, 2014). Whilst *de novo* linkage map assembly with large numbers of  
83 SNPs is possible (Rastas *et al.*, 2016), one approach to ameliorate the computational cost and  
84 map resolution is to use genome sequence data from related species to inform initial marker  
85 orders. Larger and finer scale rearrangements can then be refined through further investigation  
86 of recombination fractions between markers.

87 In this study, we use this approach to construct a high density linkage map in a wild population  
88 of red deer (*Cervus elaphus*). The red deer is a large deer species widely distributed across  
89 the northern hemisphere, and is a model system for sexual selection and behaviour (Clutton-  
90 Brock *et al.*, 1982; Kruuk *et al.*, 2002), hybridisation (Senn & Pemberton, 2009), inbreeding  
91 (Huisman *et al.*, 2016) and population management (Frantz *et al.*, 2006). They are also an  
92 increasingly important economic species farmed for venison, antler velvet products and trophy  
93 hunting (Brauning *et al.*, 2015). A medium density map (~600 markers) is available for this  
94 species, constructed using microsatellite, RFLP and allozyme markers in a red deer × Père  
95 David's deer (*Elaphurus davidianus*) F<sub>2</sub> cross (Slate *et al.*, 2002). However, these markers  
96 have been largely superseded by the development of a Cervine Illumina BeadChip which char-  
97 acterises 50K SNPs throughout the genome (Brauning *et al.*, 2015). SNP positions were initially  
98 assigned relative to the cattle genome, but the precise order of SNPs in red deer remains un-  
99 known. Here, we integrate pedigree and SNP data from a long-term study of wild red deer on  
100 the island of Rum, Scotland to construct a predicted linkage map of ~ 38,000 SNP markers and  
101 a skeleton linkage map of ~11,000 SNP markers. As well as identifying strong concordance  
102 with the cattle genome and several chromosomal rearrangements, we also present evidence of  
103 strong female-biased recombination rates at peri-centromeric regions of the genome which is  
104 more pronounced in fission chromosomes that would have had to produced new centromeres.  
105 We discuss the implications of our findings for other linkage mapping studies, and the potential  
106 drivers of recombination rate variation and sexual dimorphism of this trait within this system.

## 107 **Materials and Methods**

### 108 **Study Population and SNP dataset.**

109 The red deer population is located in the North Block of the Isle of Rum, Scotland (57°02'N,  
110 6°20'W) and has been subject to an on-going individual-based study since 1971 (Clutton-Brock  
111 *et al.*, 1982). Research was conducted following approval of the University of Edinburgh's An-  
112 imal Welfare and Ethical Review Body and under appropriate UK Home Office licenses. DNA  
113 was extracted from neonatal ear punches, post-mortem tissue, and cast antlers (see Huisman  
114 *et al.*, 2016 for full details). DNA samples from 2880 individuals were genotyped at 50,541  
115 SNP loci on the Cervine Illumina BeadChip (Brauning *et al.*, 2015) using an Illumina genotyp-

116 ing platform (Illumina Inc., San Diego, CA, USA). SNP genotypes were scored using Illumina  
117 GenomeStudio software, and quality control was carried out using the *check.marker* function in  
118 GenABEL v1.8-0 (Aulchenko *et al.*, 2007) in R v3.3.2, with the following thresholds: SNP geno-  
119 typing success >0.99, SNP minor allele frequency >0.01, and ID genotyping success >0.99. A  
120 total of 38,541 SNPs and 2,631 IDs were retained. The function identified 126 pseudoautosomal  
121 SNPs on the X chromosome (i.e. markers showing autosomal inheritance patterns). Any  
122 heterozygous genotypes at non-pseudoautosomal X-linked SNPs within males were scored as  
123 missing. A pedigree of 4,515 individuals has been constructed using microsatellite and SNP  
124 data using the software Sequoia (Huisman, 2017; see Huisman *et al.*, 2016 for information on  
125 deer pedigree construction).

## 126 **Linkage map construction.**

127 A standardised sub-pedigree approach was used for linkage map construction (Johnston *et al.*,  
128 2016). The pedigree was split as follows: for each focal individual (FID) and its offspring, a  
129 sub-pedigree was constructed that included the FID, its parents, the offspring, and the other  
130 parent of the offspring (Figure 1), and were retained where all five individuals were SNP  
131 genotyped. This pedigree structure characterises crossovers occurring in the gamete trans-  
132 ferred from the FID to the offspring. A total of 1355 sub-pedigrees were constructed, allow-  
133 ing characterisation of crossovers in gametes transmitted to 488 offspring from 83 unique  
134 males and 867 offspring from 259 unique females. Linkage mapping was conducted using  
135 an iterative approach using the software CRI-MAP v2.504a (Green *et al.*, 1990), with input  
136 and output processing carried out using the R package *crimaptools* v0.1 (S.E.J., available  
137 <https://github.com/susjoh/crimaptools>) implemented in R v3.3.2. In all cases, marker order was  
138 specified in CRI-MAP based on the criteria outlined in each section below.

139 **Build 1: Order deer SNPs based on synteny with cattle genome.** Mendelian incompati-  
140 bilities were identified using the CRI-MAP *prepare* function, and incompatible genotypes were  
141 removed from both parents and offspring. SNPs with Mendelian error rates of >0.01 were dis-  
142carded (N = 0 SNPs). Sub-pedigrees with more than 50 Mendelian errors between an FID  
143and its offspring were also discarded (N = 4). All SNPs were named based on direct synteny  
144with the cattle genome (BTA vUMD 3.0; N = 30). Therefore, loci were ordered and assigned to  
145linkage groups assuming the cattle order, and a sex-averaged map of each chromosome was

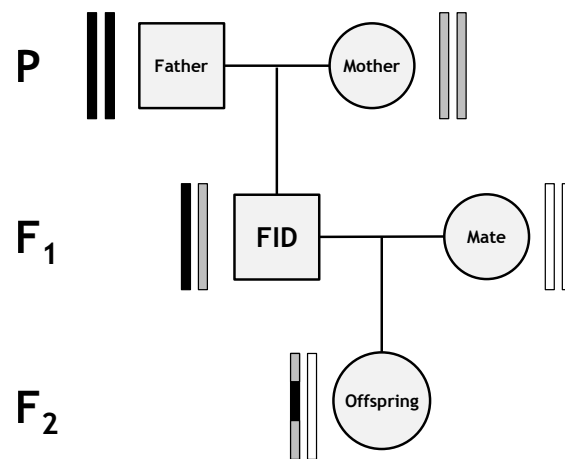

**Figure 1:** Sub-pedigree structure used to construct linkage maps. Rectangle pairs next to each individual represent chromatids, with black and grey shading indicating chromosome or chromosome sections of FID paternal and FID maternal origin, respectively. White shading indicates chromatids for which the origin of SNPs cannot be determined. Crossovers in the gamete transferred from the focal individual (FID) to its offspring (indicated by the grey arrow) can be distinguished at the points where origin of alleles origin flips from FID paternal to FID maternal and vice versa. From Johnston *et al.* (2016).

146 constructed using the CRI-MAP *chrompic* function (N = 38,261 SNPs, Figure S1).

147 **Build 2: Rerun cattle order with wrongly positioned chunks removed.** All SNP loci from  
148 Build 1 were assigned to “chunks”, defined as a run of SNPs flanked by map distances of  $\geq 3$   
149 centiMorgans (cM). Several short chunks were flanked by large map distances, indicating that  
150 they were wrongly positioned in Build 1 (Figure S1); chunks containing  $< 20$  SNPs were removed  
151 from the analysis for Build 2 (N = 327 SNPs). A sex-averaged map of each chromosome was  
152 reconstructed using the *chrompic* function (N = 37,934 SNPs, Figure S2).

153 **Build 3: Arrange chunks into deer linkage groups.** SNPs from Build 2 were arranged into  
154 34 deer linkage groups (hereafter prefixed with CEL) based on a previous characterisation of  
155 fissions and fusions from the red deer  $\times$  Père David’s deer linkage map (Slate *et al.*, 2002)  
156 and visual inspection of linkage disequilibrium (LD,  $R^2$ , calculated using the *r2fast* function in  
157 GenABEL; Figure S3). At this stage, the orientation of linkage groups was made to match that  
158 of the Slate *et al.* publication. There was strong conformity with fissions and fusions identified  
159 in the previous deer map (Table 1); intra-marker distances of  $\sim 100$  cM between long chunks  
160 indicated that they segregated as independent chromosomes. In Build 2, chunks flanked by  
161 gaps of  $\ll 100$  cM but  $> 10$  cM were observed on the maps associated with BTA13 (CEL23) and

162 BTA28 (CEL15; Figure S2). Visual inspection of LD indicated that these chunks were incorrectly  
163 orientated segments of  $\sim 10.5$  and  $\sim 24.9$  cM in length, respectively (Figure S3a and S3b; Table  
164 1). Reversal of marker orders in these regions resulted in map length reductions of 19.4 cM and  
165 20.9 cM, respectively. Visual inspection of LD also confirmed fission of CEL19 and CEL31 (syn-  
166 tenic to BTA1), with a 45.4cM inversion on CEL19 (Figure S3c). The X chromosome (BTA30,  
167 CEL34) in Build 2 was more fragmented, comprising 9 large chunks (Figure S4). Visual inspec-  
168 tion of LD in females indicated that chunks 3 and 7 occurred at the end of the chromosome,  
169 and that chunks 4, 5 and 6 were wrongly-oriented (Figure S5). After rearrangement into new  
170 marker orders, a sex-averaged map of each deer linkage group was reconstructed using the  
171 *chrompic* function (N = 37,932 SNPs, Figure S6).

172 **Build 4: Solve minor local re-arrangements.** Runs of SNPs from Build 3 were re-assigned  
173 to new chunks flanked by recombination fractions of  $\geq 0.01$  (1 cM). Maps were reconstructed  
174 to test whether inverting chunks of  $< 50$  SNPs in length and/or the deletion of chunks of  $< 10$   
175 SNPs in length led to decreases in map lengths by  $\geq 1$ cM. One wrongly-orientated chunk of 25  
176 SNPs was identified on CEL15 (homologous to part of the inversion site identified on BTA28  
177 in Build 3), and the marker order was amended accordingly (reducing the map length from  
178 101.4 cM to 98.1 cM). Three chunks on the X chromosome (CEL34) shortened the map by  
179  $\geq 1$ cM when inverted and were also amended accordingly, reducing the X-chromosome map by  
180 10.8 cM. The deletion of 35 individual SNPs on 14 linkage groups shortened their respective  
181 linkage maps by between 1cM and 6.3cM. A sex-averaged map of each deer linkage group was  
182 reconstructed using the *chrompic* function (N = 37,897 SNPs, Figure S7).

183 **Build 5: Determining the location of unmapped markers and resolving phasing errors.**  
184 In Builds 1 to 4, 372 SNPs in 89 chunks were removed from the analysis. To determine their  
185 likely location relative to the Build 5 map, LD was calculated between each unmapped SNP and  
186 all other SNPs in the genome to identify its most likely linkage group. The CRI-MAP *chrompic*  
187 function provides information on SNP phase (i.e. where the grandparent of origin of the allele  
188 could be determined) on chromosomes transmitted from the FID to offspring. The correlation  
189 between allelic phase was calculated for each unmapped marker and all markers within a 120  
190 SNP window around its most likely position. A total 186 SNPs in 18 chunks could be unambigu-  
191 ously mapped back to the genome; for all other markers, their most likely location was defined  
192 as the range in which the correlation of allelic phase with mapped markers was  $\geq 0.9$  (Adjusted

193  $R^2$ ). A provisional sex-averaged map of each deer linkage group was reconstructed using the  
194 *chrompic* function (N = 38,083 SNPs). Marker orders were reversed on the deer fission linkage  
195 groups 6, 8, 16, 22 and 31 to match the orientation of the cattle genome.

196 Errors in determining the phase of alleles can lead to incorrect calling of double crossovers (i.e.  
197 two or more crossovers occurring on the same chromosome) over short map distances, leading  
198 to errors in local marker order. To reduce the likelihood of calling false double crossover events,  
199 runs of grandparental origin consisting of a single SNP (resulting in a false double crossover  
200 across that SNP) were recoded as missing (Figure S8) and the *chrompic* function was rerun. Of  
201 the remaining double crossovers, those occurring over distances of  $\leq 10\text{cM}$  (as measured by  
202 the distance between markers immediately flanking the double crossover) were also recoded  
203 as missing. Our justification is that the majority of crossovers captured should be subject to  
204 some degree of crossover interference (i.e. Class I crossovers; Phadnis *et al.*, 2011); for the  
205 purposes of creating a broad-scale map, we have removed any crossovers that may not have  
206 been subject to interference and inflate map distances in this dataset. Finally, sex-averaged  
207 and sex-specific maps of each deer linkage group were reconstructed using the *chrompic* and  
208 *map* functions (Figure 2, Figure S9).

209 **Build 6: Building a skeleton map and testing fine-scale order variations.** In Build 5, 71.6%  
210 of intra-marker distances were 0cM; therefore, a “skeleton map” was created to examine local  
211 changes in marker orders. All runs of SNPs were re-assigned to new chunks where all SNPs  
212 mapped to the same cM position; of each chunk, the most phase-informative SNP was identified  
213 from the *.loc* output from the CRI-MAP *prepare* function (N = 10,835 SNPs). The skeleton  
214 map was split into windows of 100 SNPs with an overlap of 50 SNPs, and the CRI-MAP *flips*  
215 function was used to test the likelihood of marker order changes of 2 to 5 adjacent SNPs (*flips2*  
216 to *flips5*). Rearrangements improving the map likelihood by  $>2$  would have been investigated  
217 further; however, no marker rearrangement passed this threshold and so the Build 5 map was  
218 assumed to be the most likely map order (Map provided in Table S1).

## 219 **Determining the lineage of origin of chromosome rearrangements.**

220 Lineage of origin and/or verification of potential chromosomal rearrangements was attempted  
221 by aligning SNP flanking sequences (as obtained from Brauning *et al.*, 2015) to related genome



222 sequences using BLAST v2.4.0+ (Camacho *et al.*, 2009). Cattle and sheep diverged from deer  
223  $\sim 27.31$  Mya, and diverged from each other  $\sim 24.6$  Mya (Hedges *et al.*, 2015); therefore,  
224 rearrangements were assumed to have occurred in the lineage that differed from the other two.  
225 Alignments were made to cattle genome versions vUMD3.0 and Btau\_4.6.1, and to the sheep  
226 genome Oar\_v3.1 using default parameters in *blastn*, and the top hit was retained where  $\geq$   
227 85% of bases matched over the informative length of the SNP flanking sequence.

## 228 **Variation in recombination rate and landscape.**

229 Estimated genomic positions were calculated for each SNP based on the differences between  
230 the cattle base pair position of sequential markers. At the boundaries of rearrangements, the  
231 base pair difference between markers was estimated assuming that map distances of 1cM  
232 were equivalent to 1 megabase (Mb). The first SNP on each linkage group was given the mean  
233 start position of all cattle chromosomes. Estimated genomic positions are given in Table S1.  
234 The relationship between linkage map and estimated chromosome lengths for each sex were  
235 estimated using linear regression in R v3.3.2.

236 To investigate intra-chromosomal variation in recombination rates, the probability of crossing  
237 over was determined within 1 Mb windows using the estimated genomic positions, starting with  
238 the first SNP on the chromosome. This was calculated as the sum of recombination fractions  
239  $r$  within the window; the  $r$  between the first and last SNPs and each window boundary was  
240 calculated as  $r \times N_{boundary}/N_{adjSNP}$ , where  $N_{boundary}$  is the number of bases to the window  
241 boundary and  $N_{adjSNP}$  is the number of bases to the adjacent window SNP. Windows with  
242 recombination rates in the top 1 percentile after accounting for chromosome size were removed,  
243 as very high recombination rates may indicate map misassembly and/or underestimation of  
244 physical distances. All deer chromosomes are acrocentric, with the exception of one unknown  
245 autosome (Gustavsson & Sundt, 1968). The Build 5 linkage groups maps were orientated in  
246 the same direction as the cattle genome, and so we assumed that centromere positions in deer  
247 were at the start of the chromosome, as in cattle (Band *et al.*, 2000; Ma *et al.*, 2015).

248 In fission events, assuming no change in the original centromere position, one fission chro-  
249 mosome would have retained the centromere (in this case, CEL3, 17, 28, 29, 31 and 33),  
250 whereas the other would have had to have formed a new centromere (CEL22, 6, 26, 16, 19 and  
251 8, respectively). As all acrocentric chromosomes showed a consistently high recombination

252 rate around the female centromere (see Results), we assumed that neo-centromeres had posi-  
253 tioned themselves at the beginning of these chromosomes. We defined chromosome histories  
254 as follows: those with fissions retaining the old centromere; fissions that would have formed a  
255 new centromere; and chromosomes with no fission or fusion relative to sheep/cattle lineages.  
256 Comparison of recombination landscapes between chromosomes of different histories was car-  
257 ried out using general additive models (GAM) from 0Mb (centromere) to 40Mb, specifying  $k =$   
258 10, using the R library `mgcv` v1.8-15 (Wood, 2011) implemented in R v3.3.2. Recombination  
259 rates within each bin were adjusted for chromosome size by dividing the bin rates by the overall  
260 chromosome recombination rate (cM/Mb) for each sex. As these chromosome comparisons  
261 have a relatively small sample size ( $n = 32$ ), the GAM analysis was repeated (a) excluding  
262 each chromosome and (b) excluding two chromosomes in turn, in order to determine whether  
263 the observed effect was driven by one or two chromosomes, respectively. As chromosome  
264 sizes are markedly different between fissions retaining a centromere and those forming a new  
265 centromere (see Figure S10), comparisons were also made between new centromere chromo-  
266 somes and unchanged chromosomes of similar size (in this case, CEL6, 8, 16, 22 and 26 vs.  
267 CEL2, 7, 10, 24, 27 and 32).

## 268 **Data availability**

269 The Supplemental Material contains information on additional analyses conducted and is refer-  
270 enced within the text. Table S1 contains the full red deer linkage maps for both sexes, including  
271 estimated Mb positions and information on marker informativeness. Table S3 contains the ap-  
272 proximate positions of unmapped loci. Table S4 contains the probabilities of crossing over within  
273 1Mb windows in both sexes. Data will be publicly archived on acceptance. Code for the analysis  
274 is archived at <https://github.com/susjoh/DeerMapv4>.

**Table 1:** Synteny between the cattle and deer genomes. Large-scale fissions and fusions are informed by Slate et al (Slate *et al.*, 2002) and confirmed in this study through sequence alignment. The estimated length is calculated based on homologous SNP positions on the cattle genome BTA vUMD 3.0. The symbol † indicates where fission chromosomes would have had to have formed a new centromere.

| Deer Linkage Group (CEL) | Cattle Chr (BTA) | Number of Loci | Estimated Length (Mb) | Sex-averaged map length (cM) | Male map length (cM) | Female map length (cM) | Notes                                                                                                                                                |
|--------------------------|------------------|----------------|-----------------------|------------------------------|----------------------|------------------------|------------------------------------------------------------------------------------------------------------------------------------------------------|
| 1                        | 15               | 1158           | 82.7                  | 88.7                         | 75.2                 | 96.7                   |                                                                                                                                                      |
| 2                        | 29               | 663            | 50.3                  | 55.4                         | 51.6                 | 57.5                   |                                                                                                                                                      |
| 3                        | 5                | 885            | 57.7                  | 63.8                         | 56.5                 | 67.8                   | Fission from CEL22 in deer lineage.                                                                                                                  |
| 4                        | 18               | 971            | 65.2                  | 81.3                         | 72.5                 | 85.9                   |                                                                                                                                                      |
| 5                        | 17, 19           | 2039           | 137.9                 | 126.8                        | 119.7                | 130.8                  | Fusion of BTA17 & BTA19 in deer lineage. Likely to be metacentric.                                                                                   |
| 6                        | 6                | 723            | 52.6                  | 59.6                         | 52.8                 | 63.5                   | Fission from CEL17 in deer lineage. †                                                                                                                |
| 7                        | 23               | 660            | 51.7                  | 64.0                         | 60.6                 | 65.7                   |                                                                                                                                                      |
| 8                        | 2                | 860            | 58.0                  | 62.1                         | 54.4                 | 66.7                   | Fission from CEL33 in deer lineage. †                                                                                                                |
| 9                        | 7                | 1690           | 111.8                 | 109.4                        | 96.7                 | 116.7                  |                                                                                                                                                      |
| 10                       | 25               | 580            | 42.7                  | 55.3                         | 49.1                 | 59.2                   |                                                                                                                                                      |
| 11                       | 11               | 1547           | 107.1                 | 101.3                        | 81.7                 | 112.1                  |                                                                                                                                                      |
| 12                       | 10               | 1486           | 102.1                 | 104.2                        | 94.0                 | 110.0                  |                                                                                                                                                      |
| 13                       | 21               | 986            | 69.8                  | 76.3                         | 61.9                 | 84.3                   |                                                                                                                                                      |
| 14                       | 16               | 1113           | 82.2                  | 85.0                         | 79.4                 | 88.2                   |                                                                                                                                                      |
| 15                       | 26, 28           | 1357           | 96.4                  | 96.4                         | 79.2                 | 105.9                  | Fission into BTA26 & BTA28 in cattle lineage. ~13Mb inversion in deer lineage and ~1.5Mb inversion in cattle lineage on segment syntenic with BTA28. |
| 16                       | 8                | 674            | 47.0                  | 54.8                         | 52.8                 | 56.2                   | Fission from CEL29 in deer lineage. †                                                                                                                |
| 17                       | 6                | 1059           | 68.3                  | 67.0                         | 59.0                 | 71.5                   | Fission from CEL6 in deer lineage.                                                                                                                   |
| 18                       | 4                | 1831           | 120.7                 | 108.0                        | 98.8                 | 113.3                  |                                                                                                                                                      |
| 19                       | 1                | 1476           | 101.9                 | 99.3                         | 85.1                 | 107.3                  | Fission from CEL31, then ~36Mb inversion in deer lineage. †                                                                                          |
| 20                       | 3                | 1810           | 118.6                 | 112.9                        | 95.6                 | 122.9                  |                                                                                                                                                      |
| 21                       | 14               | 1236           | 84.1                  | 85.5                         | 69.7                 | 94.6                   |                                                                                                                                                      |
| 22                       | 5                | 882            | 62.3                  | 65.2                         | 55.2                 | 71.1                   | Fission from CEL3 in deer lineage. †                                                                                                                 |
| 23                       | 13               | 1200           | 83.3                  | 95.1                         | 84.6                 | 101.1                  | ~5.9Mb inversion in cattle lineage.                                                                                                                  |
| 24                       | 22               | 885            | 61.3                  | 69.7                         | 59.1                 | 75.9                   |                                                                                                                                                      |
| 25                       | 20               | 1066           | 72.1                  | 76.0                         | 66.9                 | 80.6                   |                                                                                                                                                      |
| 26                       | 9                | 633            | 41.7                  | 51.7                         | 50.9                 | 52.2                   | Fission from CEL28 in deer lineage. †                                                                                                                |
| 27                       | 24               | 886            | 62.5                  | 62.2                         | 47.8                 | 70.7                   |                                                                                                                                                      |
| 28                       | 9                | 938            | 65.5                  | 64.7                         | 60.3                 | 67.2                   | Fission from CEL26 in deer lineage.                                                                                                                  |
| 29                       | 8                | 969            | 67.2                  | 65.9                         | 59.2                 | 69.4                   | Fission from CEL16 in deer lineage.                                                                                                                  |
| 30                       | 12               | 1220           | 86.2                  | 86.9                         | 74.4                 | 94.0                   |                                                                                                                                                      |
| 31                       | 1                | 892            | 57.7                  | 59.1                         | 53.3                 | 62.3                   | Fission from CEL19 in deer lineage.                                                                                                                  |
| 32                       | 27               | 623            | 46.7                  | 56.7                         | 52.5                 | 59.2                   |                                                                                                                                                      |
| 33                       | 2                | 1220           | 80.4                  | 80.8                         | 70.3                 | 86.9                   | Fission from CEL8 in deer lineage.                                                                                                                   |
| 34                       | X                | 1865           | 148.2                 | 148.7                        | 40.0                 | 138.9                  | Three translocations (two in deer, one in cattle) and one ~18Mb inversion in cattle lineage; see Figure S5.                                          |
| All                      |                  | 38083          | 2644.1                | 2739.7                       | 2320.8               | 2906.3                 | Male and female autosomal maps of 2280.8 cM and 2767.4 cM, respectively.                                                                             |

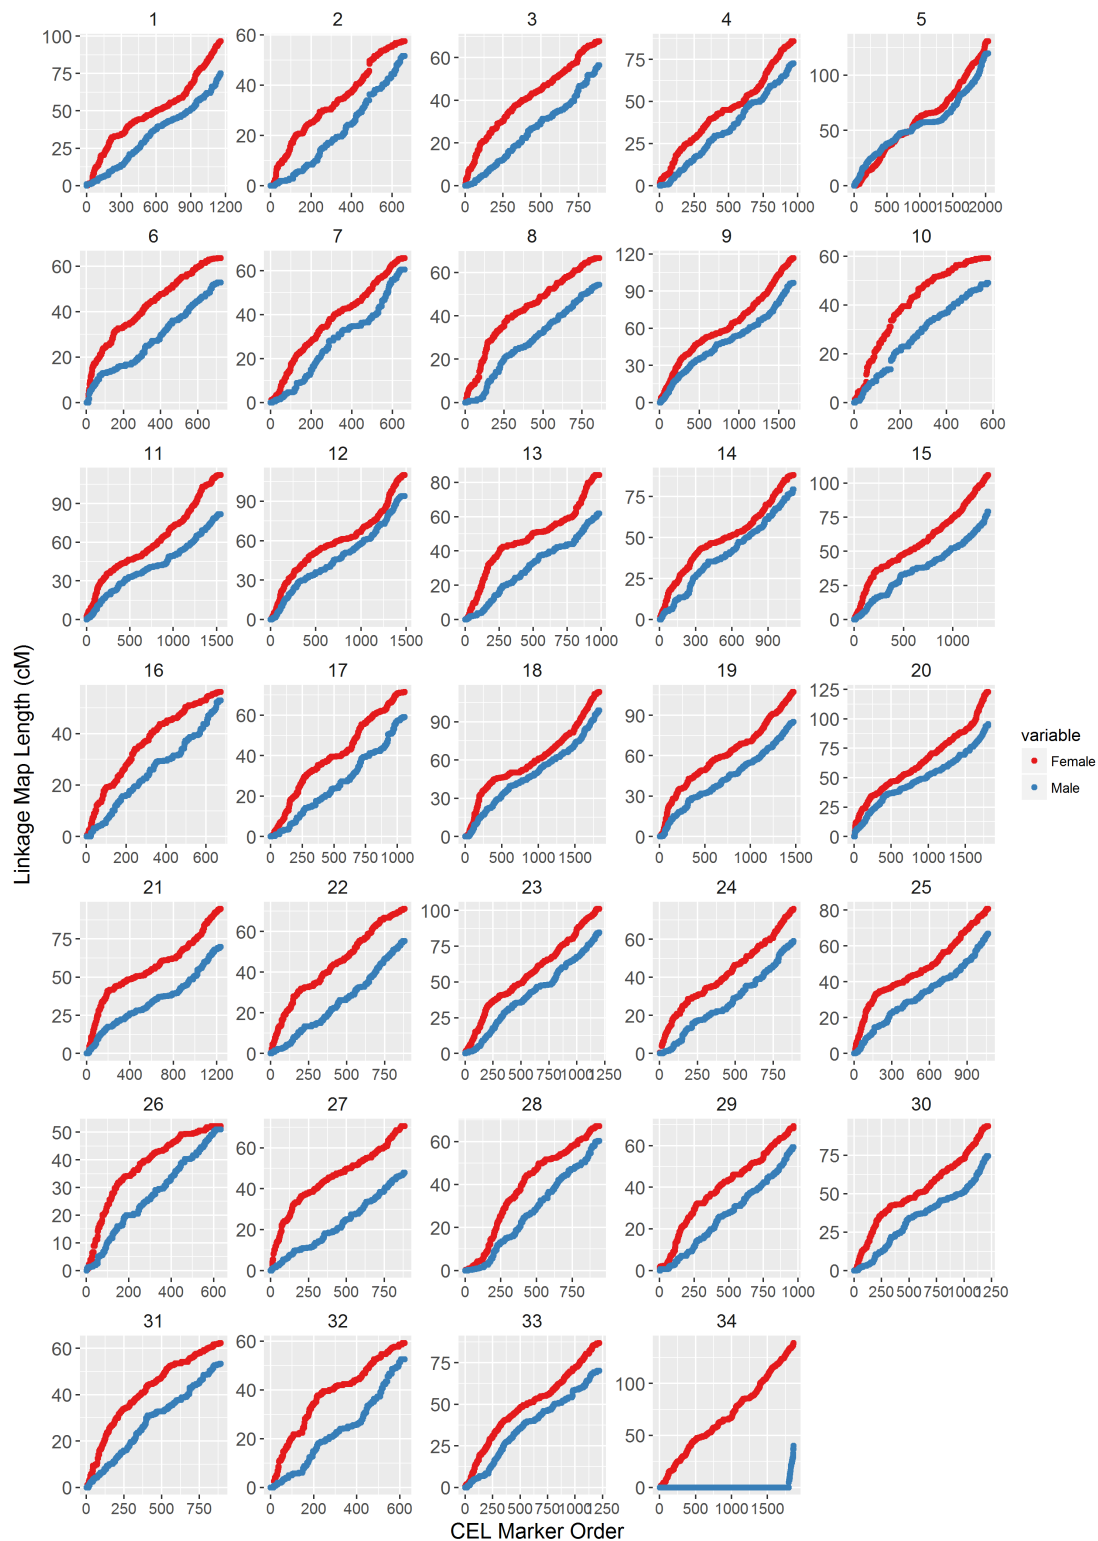

**Figure 2:** Sex-specific linkage maps for *Cervus elaphus* (CEL) linkage groups after Build 5. Map data is provided in Tables 1 and Table S1. CEL34 corresponds to the X chromosome; the short map segment in male deer indicates the pseudoautosomal region (PAR).

## 275 Results

### 276 Linkage map.

277 The predicted sex-averaged red deer linkage map contained 38,083 SNP markers over 33  
278 autosomes and the X chromosome (Figure 2; Full map provided in Table S1), and had a sex-  
279 averaged length of 2739.7cM (Table 1). A total of 71.6% of intra-marker recombination fractions  
280 were zero, and so a skeleton map of 10,835 SNPs separated by at least one meiotic crossover  
281 was also characterised (Table S1). The female autosomal map was 1.21 times longer than  
282 in males (2767.4 cM and 2280.8 cM, respectively, Table 1). In the autosomes, we observed  
283 six chromosomal fissions, one fusion and two large and formerly uncharacterised inversions  
284 occurring in the deer lineage (Table 1, Figures 3 & S3). Otherwise, the deer map order generally  
285 conformed to the cattle map order. The X chromosome had undergone the most differentiation  
286 from cattle, with evidence of three translocations, including two in the deer lineage and one in  
287 the cattle lineage, and one inversion in the cattle lineage (Figure S5, Table S2), although we  
288 cannot rule out that this observation is a result of poor assembly of the cattle genome (Zimin  
289 *et al.*, 2009). The estimated positions of 90 unmapped markers are provided in Table S4.

### 290 Variation in recombination rate and landscape.

291 There was a linear relationship between estimated chromosome length and sex-averaged link-  
292 age map lengths (Adjusted  $R^2 = 0.961$ , Figure 4A). Smaller chromosomes had higher recom-  
293 bination rates (cM/Mb, Adjusted  $R^2 = 0.387$ , Figure 4B), which is likely to be a result of obligate  
294 crossing over. Female linkage maps were consistently longer than male linkage maps across  
295 all autosomes (Adjusted  $R^2 = 0.907$ , Figures S11) and correlations between estimated map  
296 lengths and linkage map lengths were similar in males and females (Adjusted  $R^2 = 0.910$  and  
297  $0.954$ , respectively; Figure S12). In order to ensure that sex-differences in map lengths are not  
298 due to the over-representation of female meioses in the dataset, maps were reconstructed for  
299 ten subsets of 483 male and 483 female FID-offspring pairs randomly sampled with replace-  
300 ment from the dataset. There was no significant difference between the true and sampled map  
301 lengths in males and females (Figure S13), suggesting that the data structure did not introduce  
302 bias in estimating sex-specific map lengths.

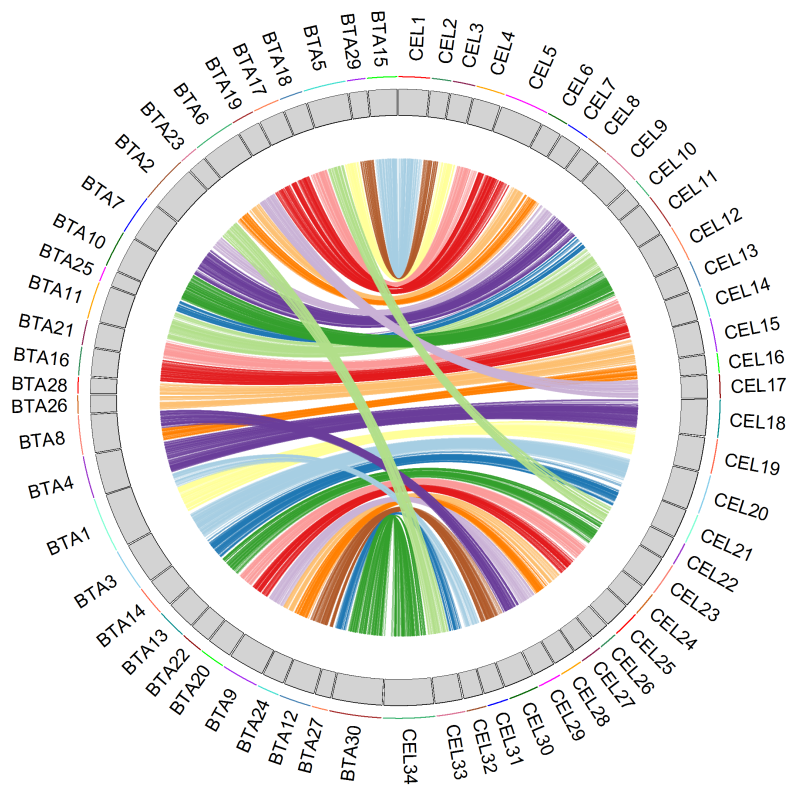

**Figure 3:** Comparison of marker positions on red deer linkage groups (right, ordered and prefixed CEL) and their predicted positions on cattle chromosomes (left, prefixed BTA). Data is shown for a sample of 2,000 SNPs. Large-scale rearrangement information and map data is provided in Tables 1 and Table S1, respectively. BTA30 and CEL34 indicate the X chromosome. Plot was produced using the R package RCircos v1.1.3 (Zhang *et al.*, 2013) in R v3.3.2

303 Fine-scale variation in recombination rate across chromosomes was calculated in 1Mb windows  
304 across the genome; recombination rate was considerably higher in females in the first ~20%  
305 of the chromosome, where the centromere is likely to be situated (Figure 5). This effect was  
306 consistent across nearly all autosomes (Figure 6). Male and female recombination rates were  
307 not significantly different across the rest of the chromosome, although male recombination was  
308 marginally higher than females in sub-telomeric regions (i.e. where the centromere was absent;  
309 Figure 5). Both sexes showed reduced recombination in sub-telomeric regions - this effect is  
310 likely to be genuine and not due to reduced ability to infer crossovers within these regions, as  
311 the number of phase informative loci at these loci did not differ from the rest of the chromo-  
312 some (Figure S14). It should be noted that in some chromosomes, female recombination rates  
313 dropped sharply in the first window of the chromosome (Figure 6), indicating that recombination  
314 rates are likely to be very low in close proximity to the centromere.

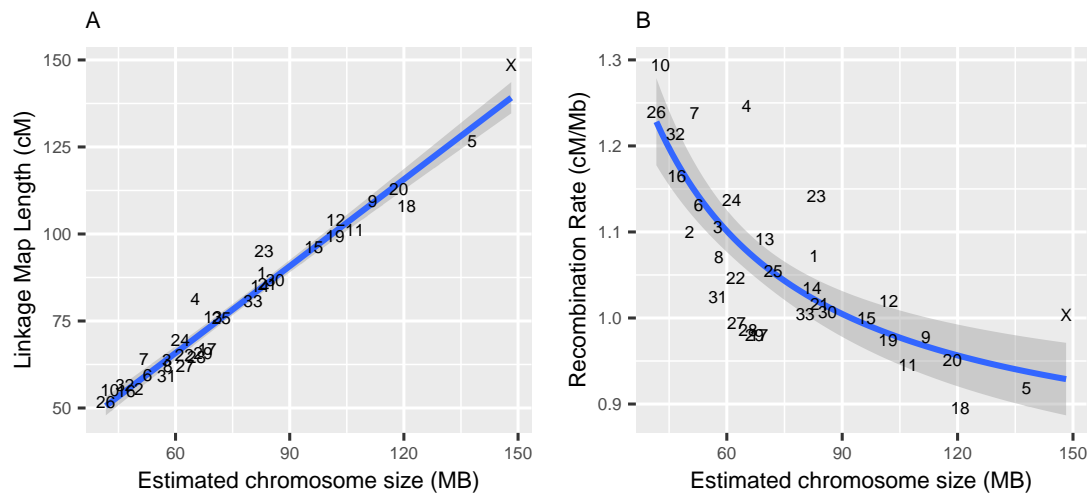

**Figure 4:** Broad-scale variation in recombination rate, showing correlations between (A) sex-averaged linkage map length (cM) and estimated chromosome length (Mb) and (B) estimated chromosome length (Mb) and chromosomal recombination rate (cM/Mb). Points are chromosome numbers, and lines and the grey-shaded areas indicate the regression slopes and standard errors, respectively.

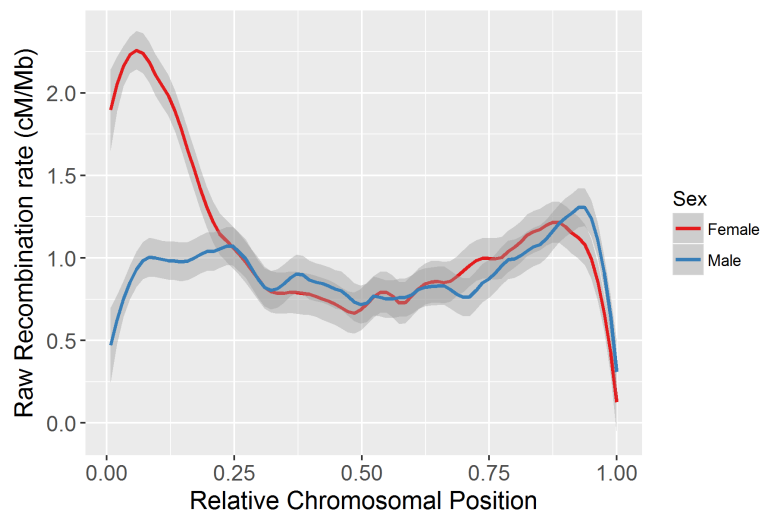

**Figure 5:** Loess smoothed splines of recombination rates across 32 acrocentric autosomes for males and females with a span parameter of 0.15. The centromere is assumed to be at the beginning of the chromosome. Splines for individual chromosomes are shown in Figure 6.

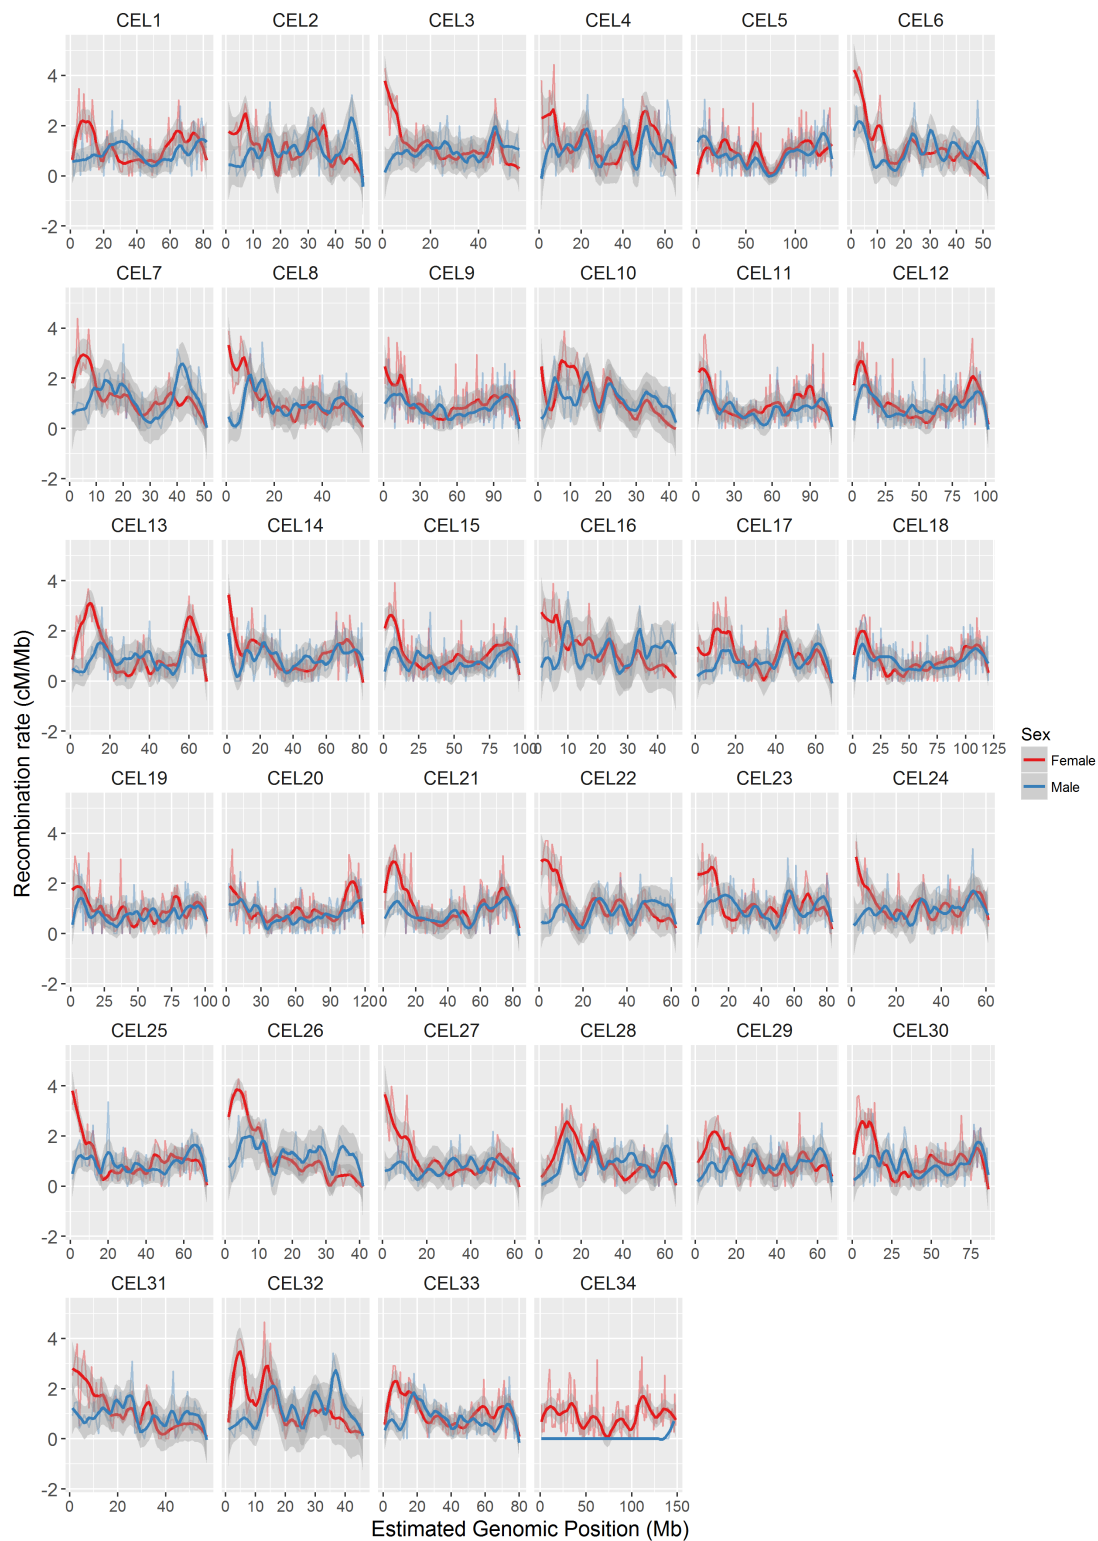

**Figure 6:** Loess smoothed splines of recombination rates in 1Mb windows across 33 autosomes for males and females with a span parameter of 0.2. All chromosomes are acrocentric with the centromere at the beginning of the chromosome (Gustavsson & Sundt, 1968), with the likely exception of CEL5. CEL34 is the X chromosome, with the pseudoautosomal region at the telomere end.



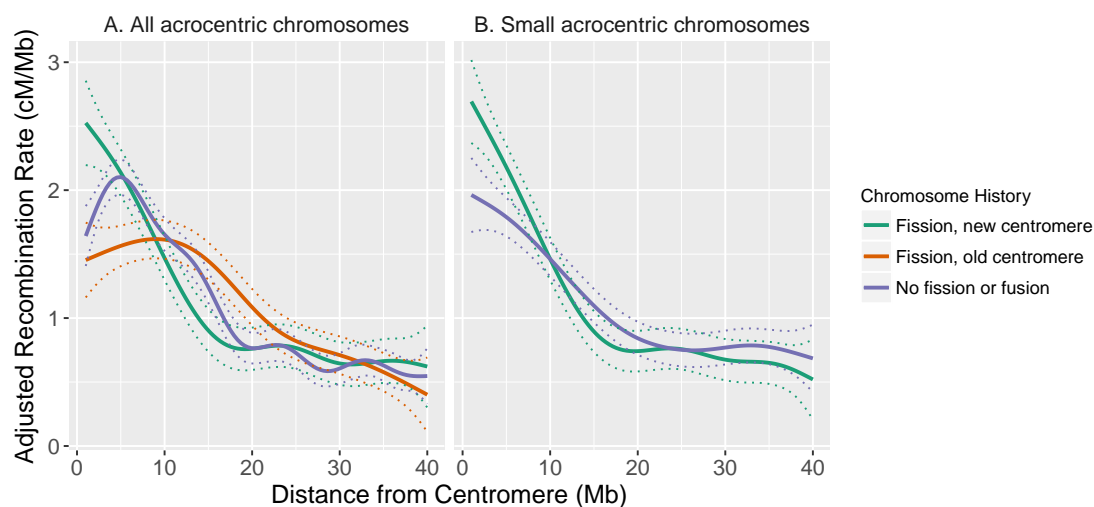

**Figure 7:** General additive model curves of adjusted recombination rate in females ( $k = 10$ ). A. All acrocentric chromosomes, including fission chromosomes forming a new centromere ( $n = 6$ ), fission chromosomes retaining the existing centromere ( $n = 6$ ) and chromosomes with no fission or fusion ( $n = 20$ ). B. Small acrocentric chromosomes, including fission chromosomes forming a new centromere ( $n = 5$ ) and chromosomes with no fission or fusion ( $n = 6$ ). Dashed lines indicate the standard errors. Recombination rates were adjusted for chromosome length (see main text).

315 General additive models of recombination rate variation in acrocentric chromosomes indicated  
316 that female recombination rates at the closest proximity to the centromere were higher in fission  
317 chromosomes that would have had to have formed a new centromere (Figure 7A); this result  
318 held when one or two chromosomes were removed (not shown), and when considering small  
319 chromosomes only (Figure 7B). There were no differences in recombination rates in males with  
320 differences in chromosome history (Figure S15).

## 321 Discussion

322 In this study, we constructed predicted and skeleton linkage maps for a wild population of  
323 red deer, containing 38,083 and 10,835 SNPs, respectively. Females had higher recombi-  
324 nation rates than males, which was driven by significantly higher recombination rates in peri-  
325 centromeric regions. These rates were unusually high compared to other mammal species, and  
326 the effect was more pronounced in fission chromosomes that have formed centromeres more  
327 recently in their history. Here, we discuss issues related to the map assembly and utility, before  
328 proposing two explanations to explain strong heterochiasmy in peri-centromeric regions: (1)

329 that this mechanism may have evolved to counteract centromeric drive associated with meiotic  
330 asymmetry in oocyte production; and/or (2) that sequence characteristics suppressing recom-  
331 bination in close proximity to the centromere may not have yet evolved at the neo-centromeres.

332 **Utility of the red deer linkage map.** The final predicted linkage map included 38,083 SNPs,  
333 accounting for 98.8% of polymorphic SNPs within this population. Whilst several large-scale re-  
334 arrangements were identified in the red deer lineage (Table 1, Figure 3), marker orders generally  
335 corresponded strongly to the cattle genome order. We are confident that the maps presented  
336 here are highly accurate for the purposes of genetic analyses outlined in the introduction; how-  
337 ever, we also acknowledge that some errors are likely to be present. The limited number of  
338 meioses characterised means that we cannot guarantee a correct marker order on the pre-  
339 dicted map at the same centiMorgan map positions, meaning that some small rearrangements  
340 may be undetected within the dataset. Furthermore, the use of the cattle genome to inform ini-  
341 tial marker order may also introduce error in cases of genome misassembly. Considering these  
342 issues, we recommend that the deer marker order is used to verify, rather than inform any *de*  
343 *novo* sequence assembly in the red deer or related species.

344 **Mapping of the X chromosome (CEL34).** The X chromosome (CEL34) showed the highest  
345 level of rearrangement, including two translocations in the deer lineage, one of which was a  
346 small region in the pseudoautosomal region (PAR) remapped to the distal end of the chromo-  
347 some (Figure S5). However, some caution should be exerted in interpreting whether these  
348 rearrangements relative to other species are genuine, as it has been acknowledged that the  
349 X chromosome assembly in cattle is of poorer quality in comparison to the autosomes (Zimin  
350 *et al.*, 2009; Ma *et al.*, 2015). The X chromosome showed a similar pattern to the autosomes  
351 in the relationship between estimated chromosome length (Mb) and linkage map length (cM,  
352 Figure 4). This may seem counter-intuitive, as recombination rates in the X should be lower due  
353 to it spending one-third of its time in males, where meiotic crossovers only occur on the PAR.  
354 However, female map lengths were generally longer, and 64% of the meioses used to inform  
355 sex-averaged maps occurred in females; furthermore, the female-specific map showed that the  
356 X conformed to the expected map length (Figure S12). Therefore, the linkage map length of  
357 the X is as expected; however, we acknowledge that some errors or inflation may be present on  
358 the X given that fewer informative meioses occur in non-PAR regions.

359 **Predicting centromere positioning on the deer linkage groups.** Cytogenetic studies have  
360 shown that deer chromosomes are acrocentric (i.e. the centromere is situated at one end of  
361 the chromosome), with the exception of one unknown metacentric autosome, which is one of  
362 the physically largest (Gustavsson & Sundt, 1968). Our results suggest that the strongest can-  
363 didate is CEL5, which has undergone a fusion event in the deer lineage (Table 1). Unlike other  
364 autosomes, this linkage group shows strong concordance between males and female cM maps  
365 (Figure 2), elevated male recombination rate at the chromosome ends and reduced recombina-  
366 tion in a ~8Mb region that corresponds with the fusion site at the centromeric regions of BTA17  
367 and BTA19 (Figure 6). On the acrocentric chromosomes, we have assumed that centromeres  
368 are at the beginning of each linkage group, based on synteny of centromere positions with the  
369 cattle genome (Ma *et al.*, 2015). There is evidence that centromeres can change position on  
370 mammalian chromosomes (Carbone *et al.*, 2006; Graphodatsky *et al.*, 2011). However, the fre-  
371 quency of this is sufficiently low, and recombination patterns so consistent in our dataset (Figure  
372 6) that we believe our assumption is justified, particularly for chromosomes that have not un-  
373 dergone fission or fusion events in either lineage (Table 1). Six of the fission chromosomes  
374 (CEL6, CEL8, CEL16, CEL19, CEL22 and CEL26) would have had to form new centromeres in  
375 the deer lineage. Direct orientation with the cattle genome shows similar patterns of recomb-  
376 nation to other chromosomes (Figure 6), indicating that telomeric regions have most likely not  
377 changed, and that centromeres have positioned themselves at the beginning of the chromo-  
378 somes. Nevertheless, we acknowledge that confirmation of centromeric positions will require  
379 further investigation.

380 **Sexual dimorphism in recombination landscape: a consequence of meiotic drive?** Fe-  
381 males had considerably higher recombination rates in peri-centromeric regions, resulting in  
382 female-biased recombination rates overall; recombination rates along the remainder of the chro-  
383 mosome were similar in both sexes, and lowest at the closest proximity to the telomere (Figure  
384 5). Identifying female-biased heterochiasmy is not unusual, as recombination rates in placen-  
385 tal mammals are generally higher in females, particularly towards the centromere (Lenormand  
386 & Dutheil, 2005; Brandvain & Coop, 2012). Nevertheless, the patterns of recombination rate  
387 variation observed in this dataset are striking for several reasons. First, our findings are distinct  
388 from the other ruminants, namely cattle and sheep, which both exhibit male-biased heterochi-  
389 asmy driven by elevated male recombination rates in sub-telomeric regions, with similar male  
390 and female recombination rates in peri-centromeric regions (Ma *et al.*, 2015; Johnston *et al.*,

391 2016). Indeed, all other mammal studies to date show increased male sub-telomeric recom-  
392 bination even if female recombination rates are higher overall (e.g. in humans and mice; Kong  
393 *et al.*, 2010; Liu *et al.*, 2014). Second, whilst female recombination rates tend to be relatively  
394 higher in peri-centromeric regions in many species, the degree of difference is relatively small  
395 compared to that observed in the deer, and is generally suppressed in very close proximity the  
396 centromere (Brandvain & Coop, 2012); in this study, we observed female recombination rates  
397 of 2-5 times that of males within this region.

398 There are several hypotheses proposed to explain increased recombination rates in female  
399 mammals (Brandvain & Coop, 2012). The most prevalent has been the idea that increased  
400 crossover number in females protects against aneuploidy (i.e. non-disjunction) after long pe-  
401 riods of meiotic arrest during Prophase I (Morelli & Cohen, 2005; Coop & Przeworski, 2007;  
402 Nagaoka *et al.*, 2012). While we cannot rule this out as a potential driver, female deer on Rum  
403 reach sexual maturity at a relatively young age (~ 3 years of age) compared to other large mam-  
404 mals. A more compelling hypothesis relates to the role of meiotic drive, where asymmetry in  
405 meiotic cell divisions in females can be exploited by selfish genetic elements associated with the  
406 centromere (Brandvain & Coop, 2012 & Introduction), where higher female recombination at the  
407 peri-centromeric regions may counteract centromeric drive by increasing the uncertainty asso-  
408 ciated segregation into the egg (Haig & Grafen, 1991). Our observation that chromosomes with  
409 newer centromeres show increased recombination in close proximity to the centromere may  
410 support this idea (Figure 7). Whilst there is still generally little consensus on the mechanisms  
411 related to the formation of new centromeres (Rocchi *et al.*, 2011), conflict between centromeric  
412 proteins and repetitive centromeric DNA may lead to rapid evolution of centromere strength  
413 in a new or recently formed centromere (Rosin & Mellone, 2017). Increased recombination  
414 rates in close proximity to a newer centromere could provide a mechanism to counter stronger  
415 drive. Alternatively (but not exclusively), increased recombination on these chromosomes may  
416 be because sequence characteristics suppressing peri-centromeric recombination have not yet  
417 evolved at the more recent centromeres; we also acknowledge that this effect may also be  
418 driven by mapping errors at the chromosome ends, particularly if polymorphisms in close prox-  
419 imity to the centromere have not been characterised and/or mapped. Ultimately, confirmation  
420 of our findings and ruling out other plausible hypotheses for our observations will require further  
421 investigation, using sequence-based approaches for verifying map orders and recombination  
422 rates, and cytogenetic investigation of centromere positioning and dynamics across the deer  
423 lineage.

## 424 Acknowledgements

425 We thank T. Clutton-Brock, F. Guinness, S. Albon, A. Morris, S. Morris, M. Baker and many  
426 others for collecting field data and DNA samples and their important contributions to the long-  
427 term Rum deer project. Discussions with C. Bérénos & J. Risse aided the study in its early  
428 stages; we also appreciate discussion with T. Lenormand, L. Ross, D. Charlesworth, L. Ma  
429 and many Twitter users (Y. Brandvain, G. Coop, L. Holman, A. Kern, A. Mason, T. Price and  
430 L. Theodosiou) on interpreting the pattern of high peri-centromeric recombination in females.  
431 We thank Scottish Natural Heritage for permission to work on the Isle of Rum National Nature  
432 Reserve, and the Wellcome Trust Clinical Research Facility Genetics Core in Edinburgh for  
433 performing the genotyping. This work has made extensive use of the resources provided by  
434 the University of Edinburgh Compute and Data Facility (<http://www.ecdf.ed.ac.uk/>). The long-  
435 term project Rum deer is funded by the UK Natural Environment Research Council, and SNP  
436 genotyping was supported by a European Research Council Advanced Grant to J.M.P. S.E.J.  
437 is supported by a Royal Society University Research Fellowship.

## 438 Author Contributions

439 J.M.P and J.H. organised the collection of samples. P.A.E. and J.H. conducted DNA sample  
440 extraction and genotyping. S.E.J. designed the study, analysed the data and wrote the paper.  
441 All authors contributed to revisions.

## 442 References

- 443 Aulchenko YS, Ripke S, Isaacs A, van Duijn CM (2007) GenABEL: an R library for genome-wide  
444 association analysis. *Bioinformatics*, **23**, 1294–1296.
- 445 Band MR, Larson JH, Rebeiz M, *et al.* (2000) An ordered comparative map of the cattle and  
446 human genomes. *Genome Res.*, **10**, 1359–1368.
- 447 Bérénos C, Ellis PA, Pilkington JG, Lee SH, Gratten J, Pemberton JM (2015) Heterogeneity of  
448 genetic architecture of body size traits in a free-living population. *Mol. Ecol.*, **24**, 1810–1830.

- 449 Bradbury IR, Hubert S, Higgins B, *et al.* (2013) Genomic islands of divergence and their con-  
450 sequences for the resolution of spatial structure in an exploited marine fish. *Evol. Appl.*, **6**,  
451 450–461.
- 452 Brandvain Y, Coop G (2012) Scrambling eggs: meiotic drive and the evolution of female recom-  
453 bination rates. *Genetics*, **190**, 709–23.
- 454 Brauning R, Fisher PJ, McCulloch AF, *et al.* (2015) Utilization of high throughput genome se-  
455 quencing technology for large scale single nucleotide polymorphism discovery in red deer  
456 and canadian elk. *bioRxiv*.
- 457 Briec MSO, Waters CD, Seeb JE, Naish KA (2014) A dense linkage map for chinook salmon  
458 (*Oncorhynchus tshawytscha*) reveals variable chromosomal divergence after an ancestral  
459 whole genome duplication event. *G3 Genes Genom. Genet.*, **4**, 447–460.
- 460 Burt A (2000) Sex, Recombination, and the Efficacy of Selection - was Weismann Right? *Evo-*  
461 *lution*, **54**, 337–351.
- 462 Camacho C, Coulouris G, Avagyan V, *et al.* (2009) BLAST+: architecture and applications. *BMC*  
463 *Bioinf.*, **10**, 1–9.
- 464 Carbone L, Nergadze SG, Magnani E, *et al.* (2006) Evolutionary movement of centromeres in  
465 horse, donkey, and zebra. *Genomics*, **87**, 777–782.
- 466 Charlesworth B, Barton NH (1996) Recombination load associated with selection for increased  
467 recombination. *Genet. Res.*, **67**, 27–41.
- 468 Chmátal L, Gabriel S, Mitsainas G, *et al.* (2014) Centromere strength provides the cell biological  
469 basis for meiotic drive and karyotype evolution in mice. *Current Biology*, **24**, 2295 – 2300.
- 470 Clutton-Brock T, Guinness F, Albon S (1982) *Red Deer. Behaviour and Ecology of Two Sexes*.  
471 University of Chicago Press.
- 472 Coop G, Przeworski M (2007) An evolutionary view of human recombination. *Nat Rev Genet*,  
473 **8**, 23–34.
- 474 Ellegren H (2014) Genome sequencing and population genomics in non-model organisms.  
475 *Trends Ecol. Evol.*, **29**, 51–63.
- 476 Felsenstein J (1974) The evolutionary advantage of recombination. *Genetics*, **78**, 737–756.

- 477 Fierst JL (2015) Using linkage maps to correct and scaffold de novo genome assemblies: meth-  
478 ods, challenges, and computational tools. *Front. Genet.*, **6**, 220.
- 479 Fledel-Alon A, Wilson DJ, Broman K, *et al.* (2009) Broad-scale recombination patterns underly-  
480 ing proper disjunction in humans. *PLoS Genet.*, **5**, e1000658.
- 481 Fountain T, Ravinet M, Naylor R, Reinhardt K, Butlin RK (2016) A linkage map and QTL analysis  
482 for pyrethroid resistance in the bed bug *Cimex lectularius*. *G3 Genes Genom. Genet.*, **6**,  
483 4059–4066.
- 484 Frantz AC, Pourtois JT, Heuertz M, *et al.* (2006) Genetic structure and assignment tests demon-  
485 strate illegal translocation of red deer (*Cervus elaphus*) into a continuous population. *Mol.*  
486 *Ecol.*, **15**, 3191–3203.
- 487 Graphodatsky AS, Trifonov VA, Stanyon R (2011) The genome diversity and karyotype evolution  
488 of mammals. *Mol. Cytogenet.*, **4**, 22.
- 489 Green P, Falls K, Crooks S (1990) *Documentation for CRIMAP, version 2.4*. Washington Uni-  
490 versity School of Medicine.
- 491 Gustavsson I, Sundt CO (1968) Karyotypes in five species of deer (*Alces alces* L., *Capreolus*  
492 *capreolus* L., *Cervus elaphus* L., *Cervus nippon nippon* temm. and *Dama dama* L.). *Hereditas*,  
493 **60**, 233–248.
- 494 Haig D, Grafen A (1991) Genetic scrambling as a defence against meiotic drive. *J. Theor. Biol.*,  
495 **153**, 531–558.
- 496 Hassold T, Hunt P (2001) To err (meiotically) is human: the genesis of human aneuploidy. *Nat.*  
497 *Rev. Genet.*, **2**, 280–291.
- 498 Hedges SB, Marin J, Suleski M, Paymer M, Kumar S (2015) Tree of life reveals clock-like spe-  
499 ciation and diversification. *Mol. Biol. Evol.*, **32**, 835–845.
- 500 Huisman J (2017) Pedigree reconstruction for SNP data: parentage assignment, sibship clus-  
501 tering and beyond. *Mol. Ecol. Resour.*, **In press**.
- 502 Huisman J, Kruuk LEB, Ellis PA, Clutton-Brock T, Pemberton JM (2016) Inbreeding depression  
503 across the lifespan in a wild mammal population. *Proc. Natl. Acad. Sci. U.S.A.*, **113**, 3585–  
504 3590.

- 505 Johnston SE, Bérénos C, Slate J, Pemberton JM (2016) Conserved genetic architecture under-  
506 lying individual recombination rate variation in a wild population of soay sheep (*ovis aries*).  
507 *Genetics*, **203**, 583–598.
- 508 Kardos M, Taylor HR, Ellegren H, Luikart G, Allendorf FW (2016) Genomics advances the study  
509 of inbreeding depression in the wild. *Evol. Appl.*, **9**, 1205–1218.
- 510 Kawakami T, Smeds L, Backström N, *et al.* (2014) A high-density linkage map enables a  
511 second-generation collared flycatcher genome assembly and reveals the patterns of avian  
512 recombination rate variation and chromosomal evolution. *Mol. Ecol.*, **23**, 4035–4058.
- 513 Kong A, Thorleifsson G, Gudbjartsson DF, *et al.* (2010) Fine-scale recombination rate differ-  
514 ences between sexes, populations and individuals. *Nature*, **467**, 1099–103.
- 515 Kruuk LEB, Slate J, Pemberton JM, Brotherstone S, Guinness F, Clutton-Brock T (2002) Antler  
516 size in red deer: heritability and selection but no evolution. *Evolution*, **56**, 1683–1695.
- 517 Lander ES, Schork NJ (1994) Genetic dissection of complex traits. *Science*, **265**, 5181.
- 518 Leitwein M, Guinand B, Pouzadoux J, Desmarais E, Berrebi P, Gagnaire PA (2016) A dense  
519 brown trout (*Salmo trutta*) linkage map reveals recent chromosomal rearrangements in the  
520 salmo genus and the impact of selection on linked neutral diversity. *bioRxiv*.
- 521 Lenormand T, Dutheil J (2005) Recombination difference between sexes: a role for haploid  
522 selection. *PLoS Biol.*, **3**, e63.
- 523 Liu EY, Morgan AP, Chesler EJ, Wang W, Churchill GA, Pardo-Manuel de Villena F (2014) High-  
524 resolution sex-specific linkage maps of the mouse reveal polarized distribution of crossovers  
525 in male germline. *Genetics*, **197**, 91–106.
- 526 Ma L, O’Connell JR, VanRaden PM, *et al.* (2015) Cattle Sex-Specific Recombination and Ge-  
527 netic Control from a Large Pedigree Analysis. *PLoS Genet.*, **11**, e1005387.
- 528 Mank JE (2009) The evolution of heterochiasmy: the role of sexual selection and sperm com-  
529 petition in determining sex-specific recombination rates in eutherian mammals. *Genet. Res.*,  
530 **91**, 355–363.
- 531 McKinney GJ, Seeb LW, Larson WA, *et al.* (2016) An integrated linkage map reveals candidate  
532 genes underlying adaptive variation in chinook salmon (*Oncorhynchus tshawytscha*). *Mol.*  
533 *Ecol. Resour.*, **16**, 769–783.



- 534 Morelli MA, Cohen PE (2005) Not all germ cells are created equal: Aspects of sexual dimor-  
535 phism in mammalian meiosis. *Reproduction*, **130**, 761–781.
- 536 Muller H (1964) The relation of recombination to mutational advance. *Mutat. Res.*, **1**, 2–9.
- 537 Nagaoka SI, Hassold TJ, Hunt PA (2012) Human aneuploidy: mechanisms and new insights  
538 into an age-old problem. *Nat. Rev. Genet.*, **13**, 493–504.
- 539 Pardo-Manuel De Villena F, Sapienza C (2001) Female Meiosis Drives Karyotypic Evolution in  
540 Mammals. *Genetics*, **159**, 1179–1189.
- 541 Phadnis N, Hyppa RW, Smith GR (2011) New and old ways to control meiotic recombination.  
542 *Trends Genet.*, **27**, 411 – 421.
- 543 Rastas P, Calboli FCF, Guo B, Shikano T, Merilä J (2016) Construction of ultradense linkage  
544 maps with Lep-MAP2: Stickleback F2 recombinant crosses as an example. *Genome Biol.*  
545 *Evol.*, **8**, 78–93.
- 546 Rocchi M, Archidiacono N, Schempp W, Capozzi O, Stanyon R (2011) Centromere repositioning  
547 in mammals. *Heredity*, **108**, 59–67.
- 548 Rosin LF, Mellone BG (2017) Centromeres drive a hard bargain. *Trends in Genetics*, **33**, 101 –  
549 117.
- 550 Senn HV, Pemberton JM (2009) Variable extent of hybridization between invasive sika (*Cervus*  
551 *nippon*) and native red deer (*C. elaphus*) in a small geographical area. *Mol. Ecol.*, **18**, 862–  
552 876.
- 553 Slate J, Van Stijn TC, Anderson RM, *et al.* (2002) A deer (subfamily *Cervinae*) genetic linkage  
554 map and the evolution of ruminant genomes. *Genetics*, **160**, 1587–1597.
- 555 Smukowski CS, Noor MAF (2011) Recombination rate variation in closely related species.  
556 *Heredity*, **107**, 496–508.
- 557 Stapley J, Birkhead TR, Burke T, Slate J (2008) A linkage map of the zebra finch *taeniopygia*  
558 *guttata* provides new insights into avian genome evolution. *Genetics*, **179**, 651–667.
- 559 Sturtevant AH (1913) The linear arrangement of six sex-linked factors in *Drosophila*, as shown  
560 by their mode of association. *J. Exp. Zool.*, **14**, 43–59.
- 561 Trivers R (1988) Sex differences in rates of recombination and sexual selection. In *The Evolution*  
562 *of Sex* (edited by R Michod, B Levin), pp. 270–286. Sinauer Press.

563 Wood SN (2011) Fast stable restricted maximum likelihood and marginal likelihood estimation  
564 of semiparametric generalized linear models. *Journal of the Royal Statistical Society: Series*  
565 *B (Statistical Methodology)*, **73**, 3–36.

566 Zhang H, Meltzer P, Davis S (2013) RCircos: an R package for Circos 2D track plots. *BMC*  
567 *Bioinf.*, **14**, 244.

568 Zimin AV, Delcher AL, Florea L, *et al.* (2009) A whole-genome assembly of the domestic cow,  
569 *bos taurus*. *Genome Biol.*, **10**, R42.
